# Supplementary material for: δ-Catenin Participates in EGF/AKT/p21Waf Signaling and Induces Prostate Cancer Cell Proliferation and Invasion
Source: MDPI journal article supplement (doi:10.3390/ijms22105306), 2021-05-18
Supplement: s1 [file s1]

# **$\delta$ -catenin participates in EGF/AKT/p21 signaling and induces prostate cancer cell proliferation and invasion**

Yingjie Shen, Hyoungh Jae Lee, Rui Zhou, Hanguan Kim, Gen Chen, Young-Chang Cho, Kwonseop Kim

**This file includes the following subsections:**

Supplementary Figure S1-S6

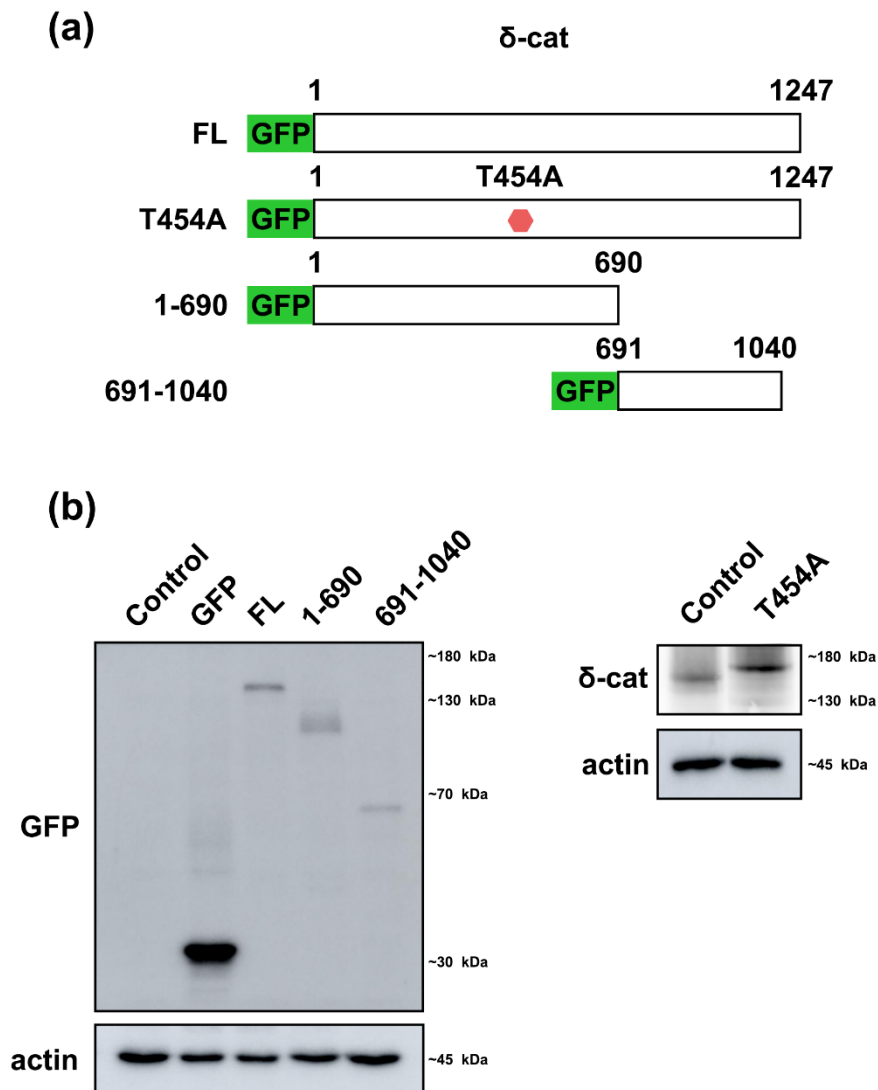

**Supplementary Figure S1**

(a) GFP plasmid was used as a negative control. GFP plasmid, GFP contacted Full-Length (FL) plasmid or mutant  $\delta$ -catenin (T454A, 1-690, 691-1040) plasmids were transfected into Rv-1 cells. (b) Cell lysates were immunoblotted with anti-GFP, anti- $\delta$ -catenin, and anti- $\beta$ -actin. This experiment was repeated independently three times.

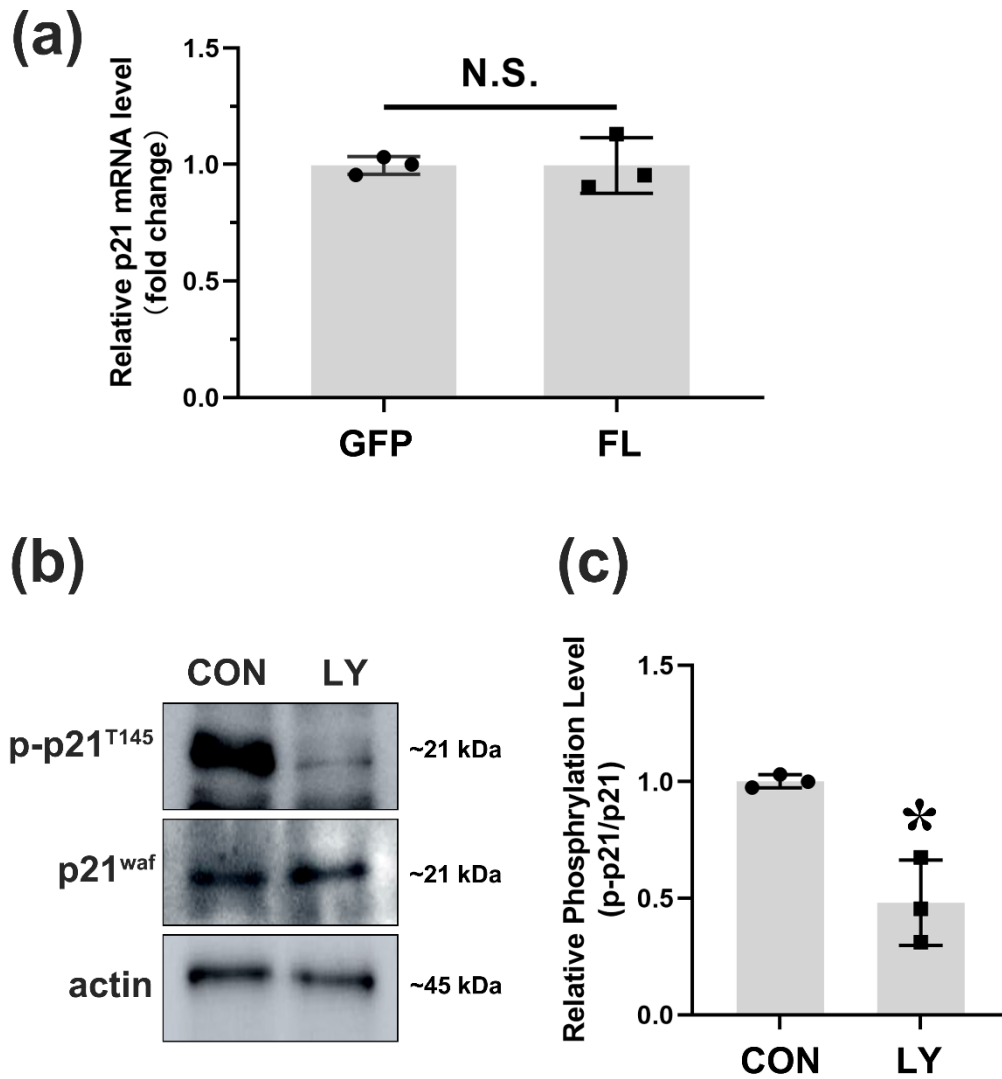

### Supplementary Figure S2

(a) Rv-1 cells were transfected with respective plasmid, and the mRNA level of p21 was detected by qRT-PCR, *N.S.*  $p > 0.001$  vs CON. (b) RV-1 cells were treated with Ly294002 (1  $\mu$ M, 24 h). (c) Cell lysates were immunoblotted with anti-p21<sup>waf</sup>, anti-p-p21<sup>T145</sup>, and anti- $\beta$ -actin,  $*p < 0.001$  vs CON.

All experiments were repeated independently three times, and *p* values were determined with unpaired Student's *t* test.

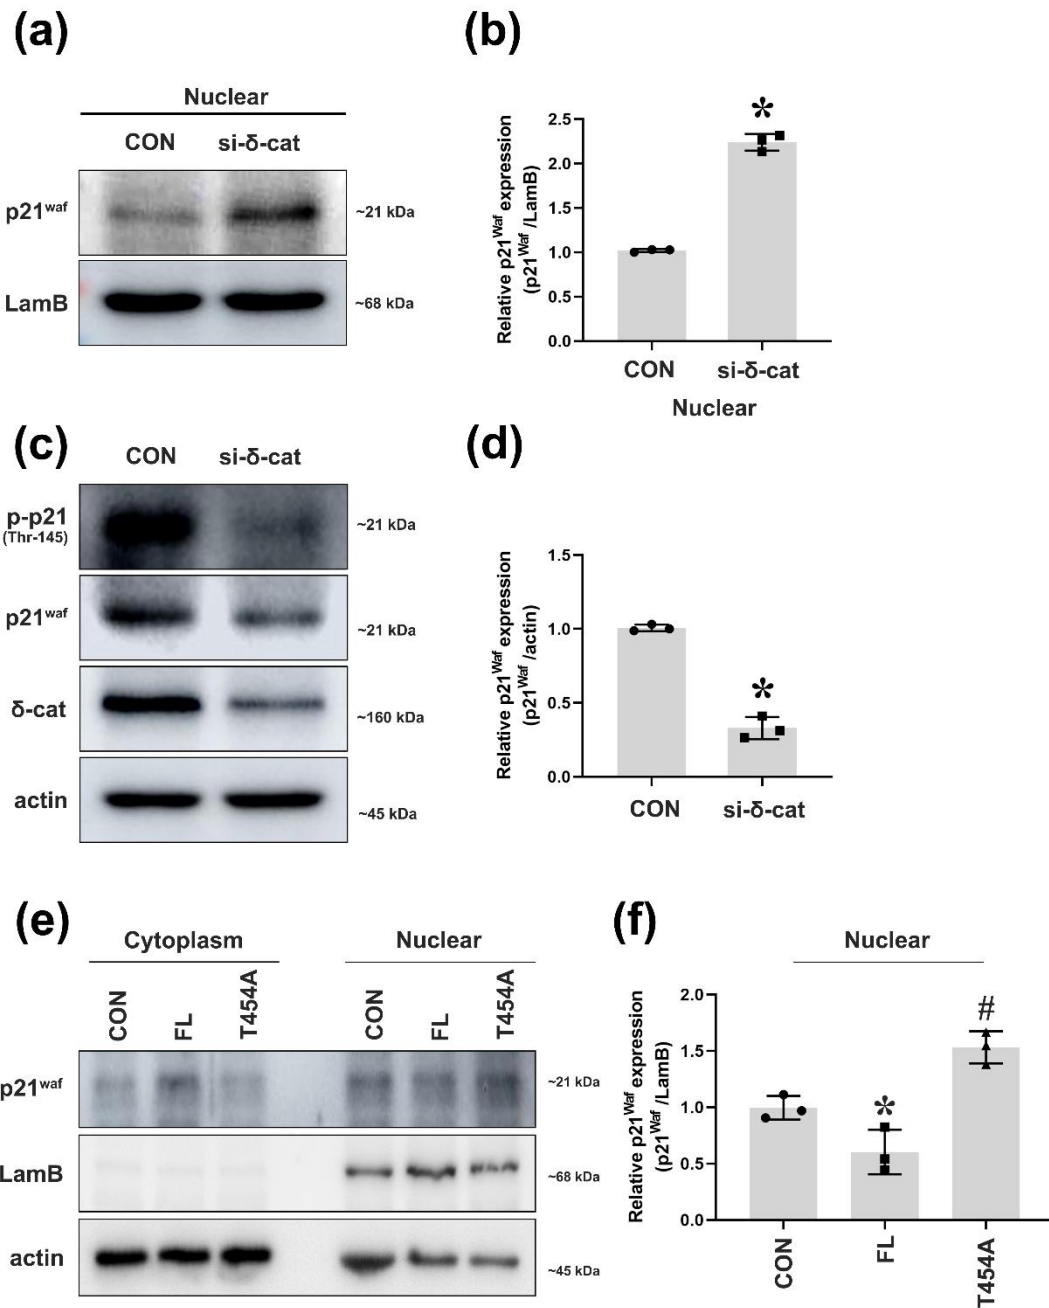

### Supplementary Figure S3

(a) RV-1 cells were transfected with si-vector and si- $\delta$ -catenin. Nucleus p21 levels were measured by immunoblotted with anti-p21<sup>waf</sup>, anti-LamB. (b) p21 densitometry data shown in (a) were normalized using LamB (Nucleus) densitometry data, and Quantitate p21/LamB, \* $p < 0.001$  vs CON. (c) RV-1 cells were transfected with si-vector and si- $\delta$ -catenin. and cell lysates were immunoblotted with anti-GFP, anti-p21<sup>T145</sup>, anti-p21<sup>waf</sup>, anti- $\delta$ -catenin and anti- $\beta$ -actin. (d) Quantitation of p-p21/p21 shown in (c), \* $p < 0.001$  vs CON. (e) RV-1 cells were transfected with respective plasmid, and cell lysates were measured by

immunoblotted with anti-p21<sup>waf</sup>, anti-LamB and anti-β-actin. (f) Quantitation of p21<sup>waf</sup>/LamB shown in (e), \**p* < 0.001 vs CON, #*p* < 0.001 vs FL.

All experiments were repeated independently three times, and *p* values were determined with unpaired Student's *t* test.

(a)

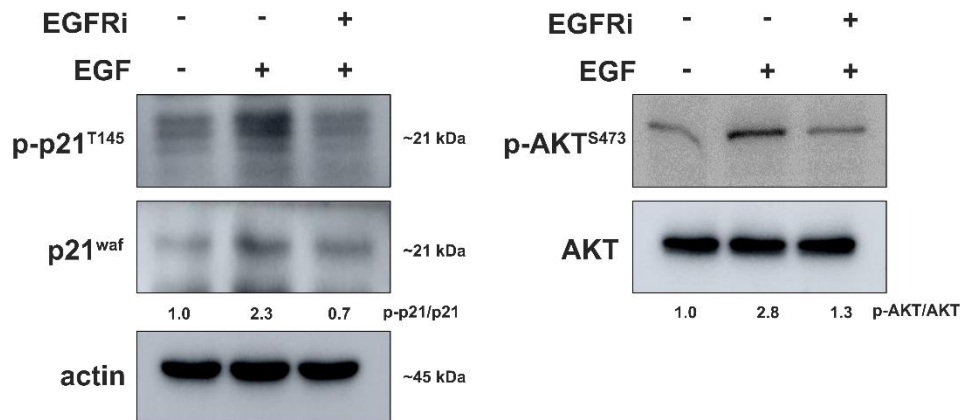

(b)

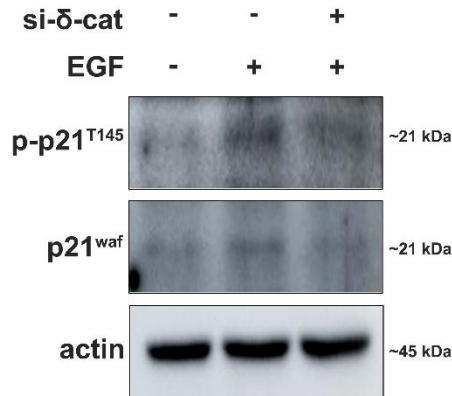

(c)

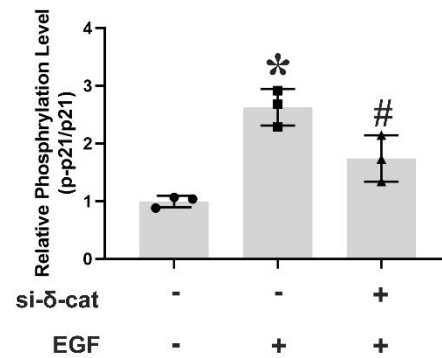

#### Supplementary Figure S4

(a) Rv-1 cells followed by serum starvation and treatment with gefitinib (10 μM, 2 h) and EGF (100 ng/mL, 5 min), and cell lysates were immunoblotted with anti-p-AKT<sup>S473</sup>, anti-AKT, anti-p-p21<sup>T145</sup>, anti-p21<sup>waf</sup> and anti-β-actin. Quantitation of p-p21/p21 ratio and p-AKT/AKT ratio. (b) Rv-1 cells were transfected with si-vector or si-δ-catenin followed by serum starvation and treatment with EGF. This experiment was repeated independently three times. (c) Quantitation of p-p21/p21 shown in (b). \**p* < 0.001 vs Control; #*p* < 0.001 vs EGF.

All *p* values were determined with unpaired Student's *t* test.

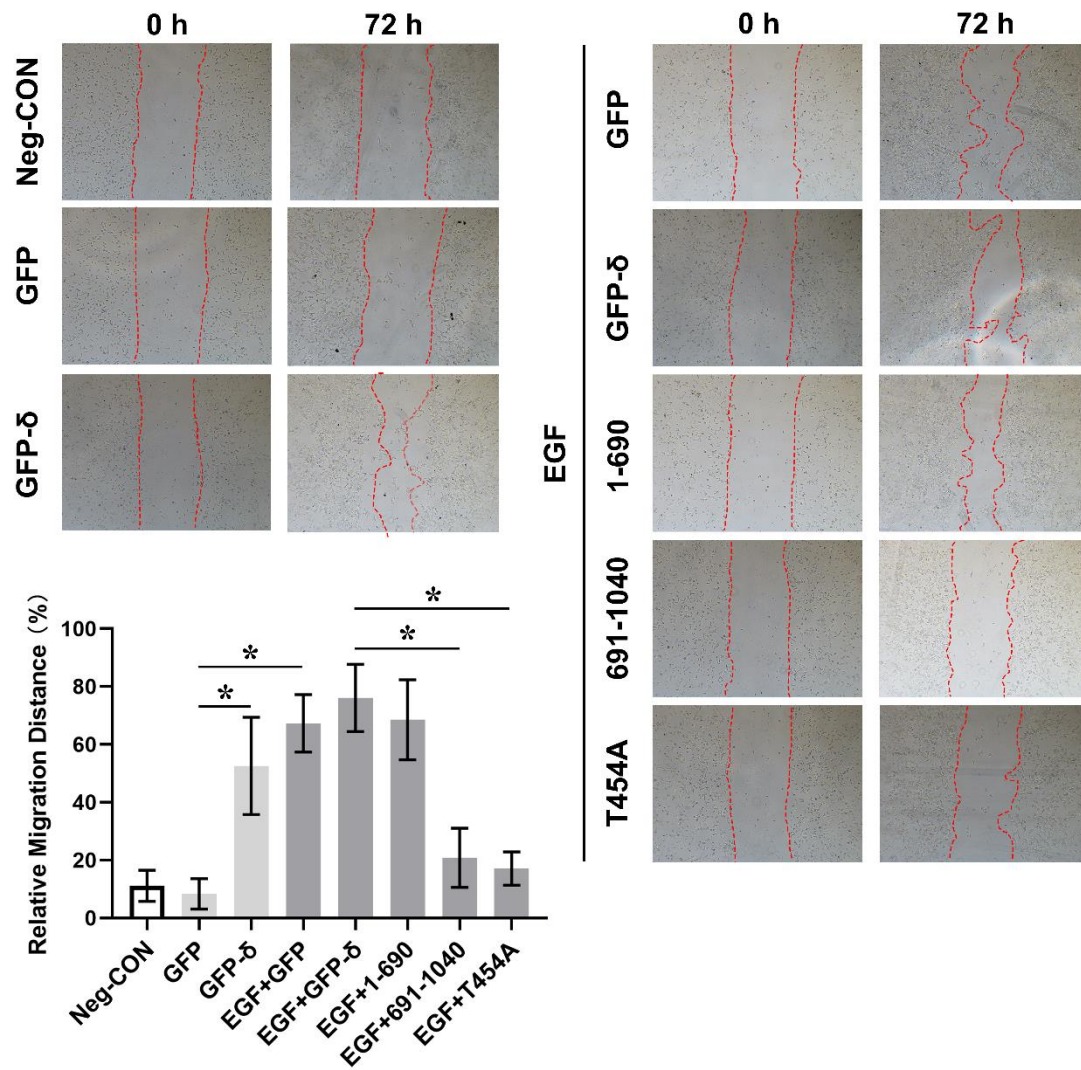

**Supplementary Figure S5**

RV-1 cells were transfected with respective plasmid, same number of cells were seeded into six-well plate. Scratch wound-healing assay were performed to transfected cells followed low serum medium (0.5% FBS) and treatment with EGF 100 ng/mL. The scratch distance at 0 h and 72 h was detected, and the cell migration rate was counted. This experiment was repeated independently five times. *p* values were determined with unpaired Student's *t* test: \**p* < 0.001.

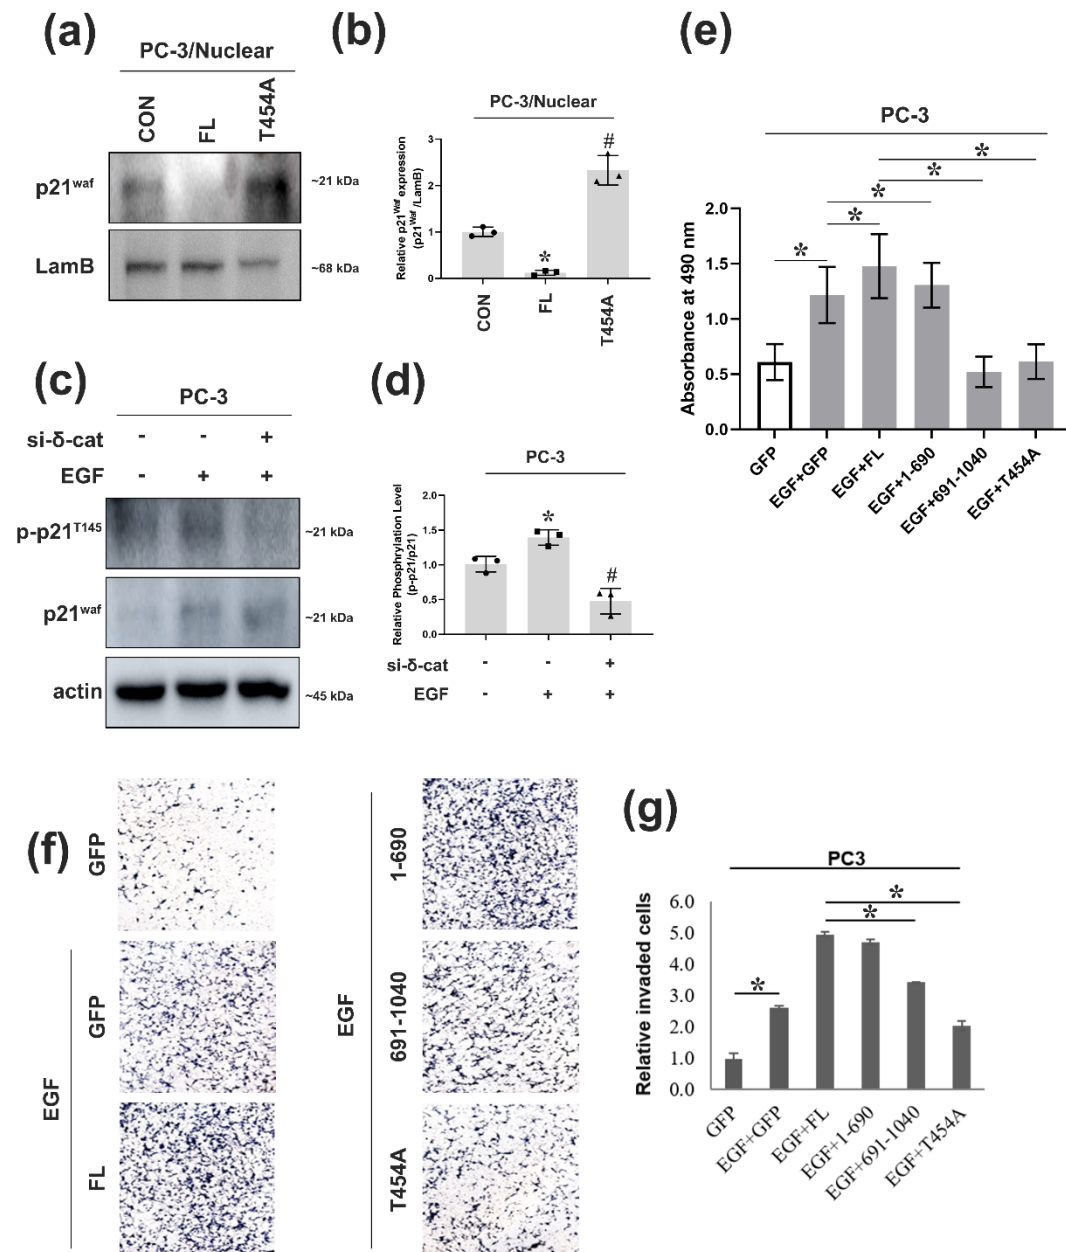

**Supplementary Figure S6**

(a) PC3 cells were transfected with respective plasmid. Nuclear p21 levels were measured by immunoblotted with anti-p21<sup>waf</sup>, anti-LamB. (b) Quantitation of p21/LamB shown in (a), \* $p < 0.001$  vs CON, # $p < 0.001$  vs FL. (c) PC3 cells were transfected with si-vector or si-δ-catenin followed by serum starvation and treatment with EGF 100 ng/mL for 5 min. (d) Quantitation of p-p21/p21 shown in (c). \* $p$  vs Control, # $p$  vs EGF. (e) PC3 cells were transfected with respective plasmid and then seeded into a 96-well plate. After 12 h, transfected cells were then serum starved followed 12 h treatment with 100 ng/mL EGF or 10% serum. After cells were incubated with CCK8 reagent at 37°C for 4 h, plates were read at 490 nm to obtain absorbance values. This experiment was repeated independently five times, \* $p < 0.001$ . (f) Transwell

assay was performed with PC3 cells transfected with respective plasmid, treating with EGF 100 ng/mL. (g)  
Quantitation of positive cells shown in (f),  $*p < 0.001$ .

*Experiments were repeated independently three times, and  $p$  values were determined with unpaired Student's  $t$  test.*
